# Supplementary material
Source: Springer Nature journal article supplement (https://www.springermedizin.de/resource/supplementary/12913_2013_3178_MOESM6_ESM.pdf/9532508)

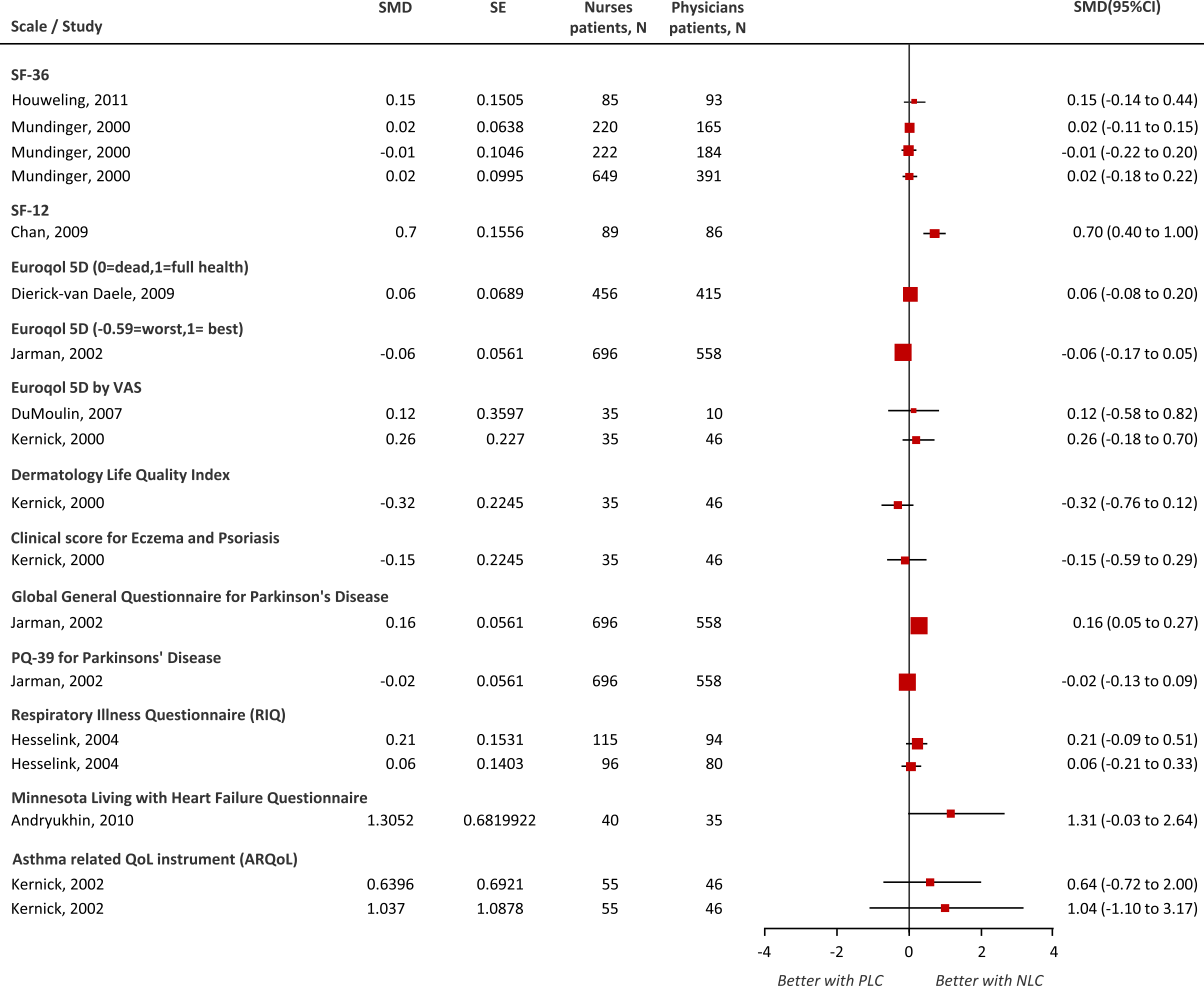

Supplement: MOESM6 [file 9532508]
